# Supplementary material for: Neurologic syndrome associated with homozygous mutation at MAG sialic acid binding site
Source: PubMed Central journal article supplement — Ann Clin Transl Neurol. 2016 Jun 23;3(8):650–4. doi: 10.1002/acn3.329 (PMC4999596; doi:10.1002/acn3.329), 2016-06-23
Supplement: ACN3-3-650-s001.pdf [file ACN3-3-650-s001.pdf]

## Patient II.5

### Motor Nerve Conduction Studies

|                         | Amp (mV) | Latency (ms) | CV (m/s) | M-Latency (ms) | F-Latency (ms) |
|-------------------------|----------|--------------|----------|----------------|----------------|
| <b>Peroneal (right)</b> |          |              |          |                |                |
| EDB-Ankle               | 1.4      | 6.5          |          |                |                |
| Ankle-Fib head          | 1.3      | 16.9         | 34       |                |                |
| Fib head-Pop fossa      | 1.2      | 19.4         | 44       |                |                |
| <b>Tibial (right)</b>   |          |              |          |                |                |
| AH-Ankle                | 3.5      | 7.9          |          |                |                |
| Ankle-Popliteal fossa   | 2.8      | 17.6         | 45       |                |                |
| <b>Median (right)</b>   |          |              |          |                |                |
| APB-Wrist               | 8.7      | 4.2          |          |                |                |
| Wrist-Elbow             | 8.4      | 9.1          | 48       |                |                |
| <b>Ulnar (right)</b>    |          |              |          |                |                |
| ADM(manus)-Wrist        | 6.9      | 3.4          |          |                |                |
| Wrist-Below elbow       | 6.7      | 8.1          | 47       |                |                |
| B.elbow-A. elbow        | 6.1      | 10.5         | 46       |                |                |

  

| Nerve      | M-Latency (ms) | F-Latency (ms) |
|------------|----------------|----------------|
| Peroneal.R | 6.5            | 77.4           |
| Tibial.R   | 7.9            | 69.9           |
| Median.R   | 4.2            | 34.7           |
| Ulnar.R    | 3.4            | 35.2           |

### Sensory Nerve Conduction Studies

|                       | Amp (µV) | Peak Lat (ms) | CV (m/s) |
|-----------------------|----------|---------------|----------|
| <b>Sural (right)</b>  |          |               |          |
| Ankle-Lower leg       | 6        | 4.1           | 42       |
| <b>Median (right)</b> |          |               |          |
| Digit II-Wrist        | 16       | 3.8           | 50       |
| <b>Ulnar (right)</b>  |          |               |          |
| Little Finger-Wrist   | 4        | 3.7           | 40       |
| <b>Radial (right)</b> |          |               |          |
| Snuff box-Forearm     | 12       | 2.4           | 53       |

| Muscle                   | Insertional | Spontaneous Activity |       |      | Ictonal Activity |           |      |        | Max Volitional Activity |         |        |
|--------------------------|-------------|----------------------|-------|------|------------------|-----------|------|--------|-------------------------|---------|--------|
|                          | Insertional | Fibs                 | +Wave | Fasc | Duration         | Amplitude | Poly | Config | Recruitment             | Pattern | Effort |
| Vastus lateralis.R       | Normal      | None                 | None  | None | Decr.            | Normal    | None | Normal | Normal                  | Full    | Max.   |
| Biceps brachii.R         | Normal      | None                 | None  | None | Decr.            | Normal    | None | Normal | Early                   | Full    | Max.   |
| 1st dorsal interosseus.R | Normal      | None                 | None  | None | Sl. Incr.        | Normal    | None | Normal | Normal                  | Full    | Max.   |
| Iliopsoas.R              | Normal      | None                 | None  | None | Normal           | Sl. Incr. | None | Normal | Reduced                 | Full    | Max.   |
| Tibialis anterior.R      | Normal      | None                 | None  | None | Sl. Incr.        | Normal    | None | Normal | Reduced                 | Full    | Max.   |
| Gastrocnemius.R          | Normal      | 3+                   | 3+    | None | Normal           | Normal    | Few  | Normal | Reduced                 | Full    | Max.   |

## Patient II.2

### Motor Nerve Conduction Studies

|                         | Amp (mV) | Latency (ms) | CV (m/s) | M-Latency (ms) | F-Latency (ms) |
|-------------------------|----------|--------------|----------|----------------|----------------|
| <b>Peroneal (right)</b> |          |              |          |                |                |
| EDB-Ankle               | 0.6      | 6.2          |          |                |                |
| Ankle-Fib head          | 0.4      | 16.4         | 31       |                |                |
| Fib head-Pop fossa      | 0.4      | 19           | 27       |                |                |
| <b>Tibial (right)</b>   |          |              |          |                |                |
| AH-Ankle                | 0.3      | 6.2          |          |                |                |
| Ankle-Popliteal fossa   | 0.3      | 17.9         | 34       |                |                |
| <b>Median (right)</b>   |          |              |          |                |                |
| APB-Wrist               | 6.9      | 6.3          |          |                |                |
| Wrist-Elbow             | 6.1      | 11.6         | 42       |                |                |
| <b>Ulnar (right)</b>    |          |              |          |                |                |
| ADM(manus)-Wrist        | 5.7      | 3.8          |          |                |                |
| Wrist-Below elbow       | 4.1      | 8.7          | 45       |                |                |
| B.elbow-A. elbow        | 4.1      | 11.7         | 33       |                |                |

  

| Nerve      | M-Latency (ms) | F-Latency (ms) |
|------------|----------------|----------------|
| Peroneal.R | 9.4            | 75             |
| Tibial.R   | 6.2            | 65.5           |
| Median.R   | 6.3            | 37.8           |
| Ulnar.R    | 3.8            | 35.8           |

### Sensory Nerve Conduction Studies

|                       | Amp (µV) | Peak Lat (ms) | CV (m/s) |
|-----------------------|----------|---------------|----------|
| <b>Sural (right)</b>  |          |               |          |
| Ankle-Lower leg       | 4        | 4.8           | 35       |
| <b>Median (right)</b> |          |               |          |
| Digit II-Wrist        | 8        | 5.6           | 30       |
| <b>Ulnar (right)</b>  |          |               |          |
| Little Finger-Wrist   | 10       | 4.1           | 38       |
| <b>Radial (right)</b> |          |               |          |
| Snuff box-Forearm     | 5        | 2.8           | 45       |

| Muscle                   | Insertional | Spontaneous Activity |       |      | Ictonal Activity |           |      |        | Max Volitional Activity                    |          |        |
|--------------------------|-------------|----------------------|-------|------|------------------|-----------|------|--------|--------------------------------------------|----------|--------|
|                          | Insertional | Fibs                 | +Wave | Fasc | Duration         | Amplitude | Poly | Config | Recruitment                                | Pattern  | Effort |
| Tibialis posterior.L     | Reduced     | None                 | None  | None | Sl. Incr.        | Sl. Incr. | None | Normal | Reduced                                    | Reduc ed | Max.   |
| Rectus femoris.L         | Normal      | None                 | None  | None | Decr.            | Sl. Incr. | Few  | Normal | Early                                      | Reduc ed | Max.   |
| Biceps brachii.L         | Normal      | None                 | None  | None | Mix              | Sl. Incr. | Few  | Normal | Reduced                                    | Reduc ed | Max.   |
| 1st dorsal interosseus.L | Normal      | None                 | None  | None | Sl. Incr.        | Sl. Incr. | None | Normal | Reduced                                    | Reduc ed | Max.   |
| Tibialis anterior.R      | Normal      | None                 | 2+    | None | Normal           | Normal    | None | Normal | Bursts of motor units with root irritation |          |        |
